# Supplementary material for: Through the Boundaries: Environmental Factors Affecting Reef Benthic Cover in Marine Protected Areas in the Philippines
Source: Frontiers journal article supplement (doi:10.3389/fmars.2021.702071), 2021-08-18
Supplement: Data_Sheet_1.xlsx [file Data_Sheet_1.xlsx]

## Sheet: Study Sites
Description of surveyed locations in this study.
Municipality		Province	Biogeographic Region	Political Region	Transects		MPA Name	Year Est.	Age at Survey	Core Area (ha)	MPA Rating/ MEAT Score*	Grp. **
					In	Out
1	Siruma	Camarines Sur	North Philippine Sea	5	5	5	Sapenitan	1994	20	19.32	Level 2: 62/84 (2011)	2
2	Tinambac	Camarines Sur	North Philippine Sea	5	7	5	AGCA	2006	6	50	Level 3: 71/84 (2014)	1
3	Caramoan	Camarines Sur	North Philippine Sea	5	5	4	Gata	2012	2	37.362	Level 0: 44/84 (2014)	2
4	Tigaon	Camarines Sur	North Philippine Sea	5	6	2	Tigaon	2010	4	62.2	Level 0: 40/84 (2012)	2
5	Sagnay	Camarines Sur	North Philippine Sea	5	4	5	Atulayan	1993	21	70.36	Level 0: 62/84 (2014)	2
6	Bacacay	Albay	North Philippine Sea	5	5	4	Uson	2002	10	453.25	Level 0: 38/84 (2012)	1
7	Gubat	Sorsogon	North Philippine Sea	5	5	4	Ragnas	2012	0	35	Level 2: 49/84 (2014)	1
8	Pilar	Cebu	Visayan Sea	7	5	5	Pilar	2005	9	179.21	Level 0: 38/84 (2012)	2
9	San Francisco CB	Cebu	Visayan Sea	7	5	5	Santiago	2006	6	18	Level 2: 64/84 (2015)	1
10	Boljoon	Cebu	Visayan Sea	7	5	5	Arbor	2004	8	9	Level 2: 80/84 (2015)	1
11	Hinunangan	Southern Leyte	South Philippine Sea	8	5	5	San Pablo	2002	10	35	Level 3: 76/84 (2014)	1
12	San Francisco SL	Southern Leyte	South Philippine Sea	8	5	5	Punta	2008	4	10	Level 3: 75/84 (2014)	1
13	Ubay	Bohol	Visayan Sea	7	5	5	Sinandigan	2005	9	51.68	Level 3: 77/84 (2014)	2
14	Inabanga	Bohol	Visayan Sea	7	5	5	Hambongan	2002	10	14.1	Level 4: 83/84 (2014)	1
15	Tagbilaran	Bohol	Visayan Sea	7	5	5	Mabaw	2006	6	14.1	Level 2: 61/84 (2012)	1
16	Roxas	Palawan	Sulu Sea	4	4	4	Caramay	2008	6	158	Level 4: 84/84 (2015)	2
17	Ayungon	Negros Oriental	Visayan Sea	7	5	5	Iniban	2008	6	27.86	Level 2: 64/84 (2014)	2
18	Bindoy	Negros Oriental	Visayan Sea	7	5	5	Mantalip	2006	8	46	Level 3: 67/84 (2012)	2
19	Amlan	Negros Oriental	Visayan Sea	7	5	5	Tandayag	2007	5	9.22	Level 2: 51/84 (2012)	1
20	Cantilan	Surigao del Sur	South Philippine Sea	13	4	4	Ayoke	2005	7	28	Level 2: 58/84 (2013)	1
21	Lanuza	Surigao del Sur	South Philippine Sea	13	5	5	Lanuza	2002	10	58	Level 2: 62/84 (2011)	1
22	Cortes	Surigao del Sur	South Philippine Sea	13	5	5	Uba	2005	7	43	Level 3: 71/84 (2014)	1
23	Lianga	Surigao del Sur	South Philippine Sea	13	5	5	KAGANA	2001	13	43.6	Level 0: 44/84 (2014)	2
24	Ipil	Zamboanga Sibugay	Celebes Sea	9	5	5	Buluan	2006	8	63.16	Level 0: 40/84 (2012)	2
25	Panabo	Davao del Norte	South Philippine Sea	11	2	4	Cagangohan	2003	11	13	Level 0: 62/84 (2014)	2
26	IGACOS - Sanipaan	Davao del Norte	Celebes Sea	11	5	5	Sanipaan	2008	4	158	Level 0: 38/84 (2012)	1
27	IGACOS - Sta. Cruz	Davao del Norte	Celebes Sea	11	5	5	Dapia	2010	4	20.13	Level 2: 49/84 (2014)	2
28	Mati	Davao Oriental	South Philippine Sea	11	5	5	Tagaliling	2005	7	28.79	Level 0: 38/84 (2012)	1
* MPA Rating and scores as assessed with the MPA Management Effectiveness Assessment Tool (MEAT), with the year when the assessment was conducted.
** Cohort Group – Cohort 1 sites were surveyed in 2012, Cohort 2 sites were surveyed in 2014.

## Sheet: Reef Health Indices - Descripti
Index	Description	Equation	Reference
Mortality Index	This index determines coral mortality by measuring the ratio of dead coral to total coral cover.	MI = (% dead coral cover (DC + DCA)) / (% hard coral cover (HC)+ % dead coral cover)	Gomez et al., 1994
Development Index	This index illustrates the level of reef development as a function of open spaces (as represented by abiotic components) for colonization.	𝐷𝐼 = log [(𝐻𝐶 + 𝑆𝐶 + 𝐷𝐶 + 𝐷𝐶𝐴 + 𝐴𝐿 + 𝑂𝑇) / 𝐴𝐵]	Manthachitra, 1994
Condition Index	This determines coral dominance as the ratio of hard coral cover to the cover of all other benthic life-forms (excluding abiotic components).	𝐶𝐼 = log [𝐻𝐶 / (𝑆𝐶 + 𝐷𝐶 + 𝐷𝐶𝐴 + 𝐴𝐿 + 𝑂𝑇)]	Manthachitra, 1994
Succession (by Algae) Index	This index presents the likelihood of algal succession, determining if algae is the dominant organism (other than hard coral) in the reef. This index is modified from the original equation to take into consideration algae growing on dead coral.	𝑆𝐼 (𝑏𝑦 𝑎𝑙𝑔𝑎𝑒) = log [𝐴𝐿 + 𝐷𝐶𝐴 / (𝑆𝐶 + 𝐷𝐶 + 𝑂𝑇)]	Manthachitra, 1994
Categorical scale for the condition, development and succession indices (Manthachitra, 1994)
Category		Index Score
Very Poor		< -0.602
Poor		-0.602 to -0.176
Fair		-0.175 to 0.176
Good		0.176 to 0.602
Very Good		> 0.602

## Sheet: Environmental Correlates
Selected environmental correlates to the variation in benthic cover.
Environmental Factor	Categories			Data Source
	1	2	3
Storm Frequency (No. storms from 1980 - 2000)	< 17.7	17.7 - 25.3	> 35.3	UP MSI Physical Oceanography Laboratory
Relative Exposure Index (2012)	< 2764.7	2764.7 - 5417.3	> 5417.33	UP MSI Physical Oceanography Laboratory
Proximity to River (km)	> 10	5 - 10	< 5 km	Google Earth
Coastal Population (2014)	< 66755	66755 - 122721	> 122721	Municipal Profile
Fisher Density (no. of fishers/area municipal water)	< 40	40 - 79	> 79	Municipal Profile
Occurrence of Poison Fishing	Low	Moderate	High	Muallil et al, 2014
Occurrence of Blast Fishing	Low	Moderate	High	Muallil et al, 2014

## Sheet: KW P-values
P-values generated from univariate comparisons of benthic cover and reef health indices among locations and MPA status (inside/outside) using the Kruskal-Wallis Test.
Variable	Location*	MPA Status
Live Hard Coral	0	0.738
Dead Coral	0	0.705
Algae	0	0.217
Other Organisms	0	0.828
Abiotic Components	0	0.845
Mortality Index	0	0.639
Condition Index	0	0.516
Development Index	0	0.368
Succession Index	0	0.957
*p = 0.000 means less than 0.001

## Sheet: PERMANOVA - Benthic Cover
PERMANOVA results comparing multivariate benthic cover
Factor	df	SS	MS	Pseudo-F	P(perm)	unique perms
Location	27	65695	2433.2	13.859	0.0001	9851
MPA Status	1	150.1	150.1	0.855	0.4774	9957
Location x MPA Status	27	7003.6	259.39	1.4775	0.0117	9838

## Sheet: PERMANOVA - Pairwise
Pair-wise PERMANOVA test results for interaction term Location x MPA Status, showing comparisons in multivariate benthic cover inside and outside the MPA per location. Highlighted in yellow are those with significant inside/outside MPA differences.
Location	Groups	t	P (perm)	Unique perms
Siruma	In, Out	1.6078	0.0847	126
Tinambac	In, Out	0.5946	0.6812	792
Caramoan	In, Out	0.6991	0.6139	126
Tigaon	In, Out	0.7219	0.529	15
Sagnay	In, Out	1.1173	0.2871	126
Bacacay	In, Out	0.956	0.3556	126
Gubat	In, Out	1.2044	0.2515	126
Pilar	In, Out	0.5686	0.7274	126
San Francisco CB	In, Out	2.6732	0.0072	126
Boljoon	In, Out	2.5322	0.0077	126
Hinunangan	In, Out	0.8458	0.5868	126
San Francisco SL	In, Out	0.981	0.363	126
Ubay	In, Out	0.7954	0.5412	126
Inabanga	In, Out	0.8114	0.515	126
Tagbilaran	In, Out	1.9721	0.0078	126
Roxas	In, Out	1.8718	0.054	35
Ayungon	In, Out	1.9406	0.0142	126
Bindoy	In, Out	1.7999	0.0163	126
Amlan	In, Out	0.769	0.6632	126
Cantilan	In, Out	1.7958	0.0559	35
Lanuza	In, Out	1.2986	0.2278	126
Cortes	In, Out	0.9542	0.4737	126
Lianga	In, Out	1.4272	0.1595	126
Ipil	In, Out	1.3326	0.29	126
Panabo	In, Out	1.4892	0.267	15
IGACOS – Sanipaan	In, Out	0.6283	0.8138	126
IGACOS – Sta. Cruz	In, Out	Negative
Mati	In, Out	1.5304	0.1103	126

## Sheet: Additional PCO Plots
Additional PCO plots for different visualization of the data depicting no consistent grouping across protected / unprotected reefs. Top: Variation in sites overlaid with Spearman correlation with benthic categories. 1 - Sites inside MPAs, 2 - Transects outside MPAs Bottom: Variation in sites overlaid with Spearman correlation with environmental correlates. 1 - Sites inside MPAs, 2 - Transects out…
